# Supplementary material
Source: publisher site journal article supplement (https://www.dovepress.com/article/310687)
Supplement: Supplementary file 1 [file get_supplementary_file.php]

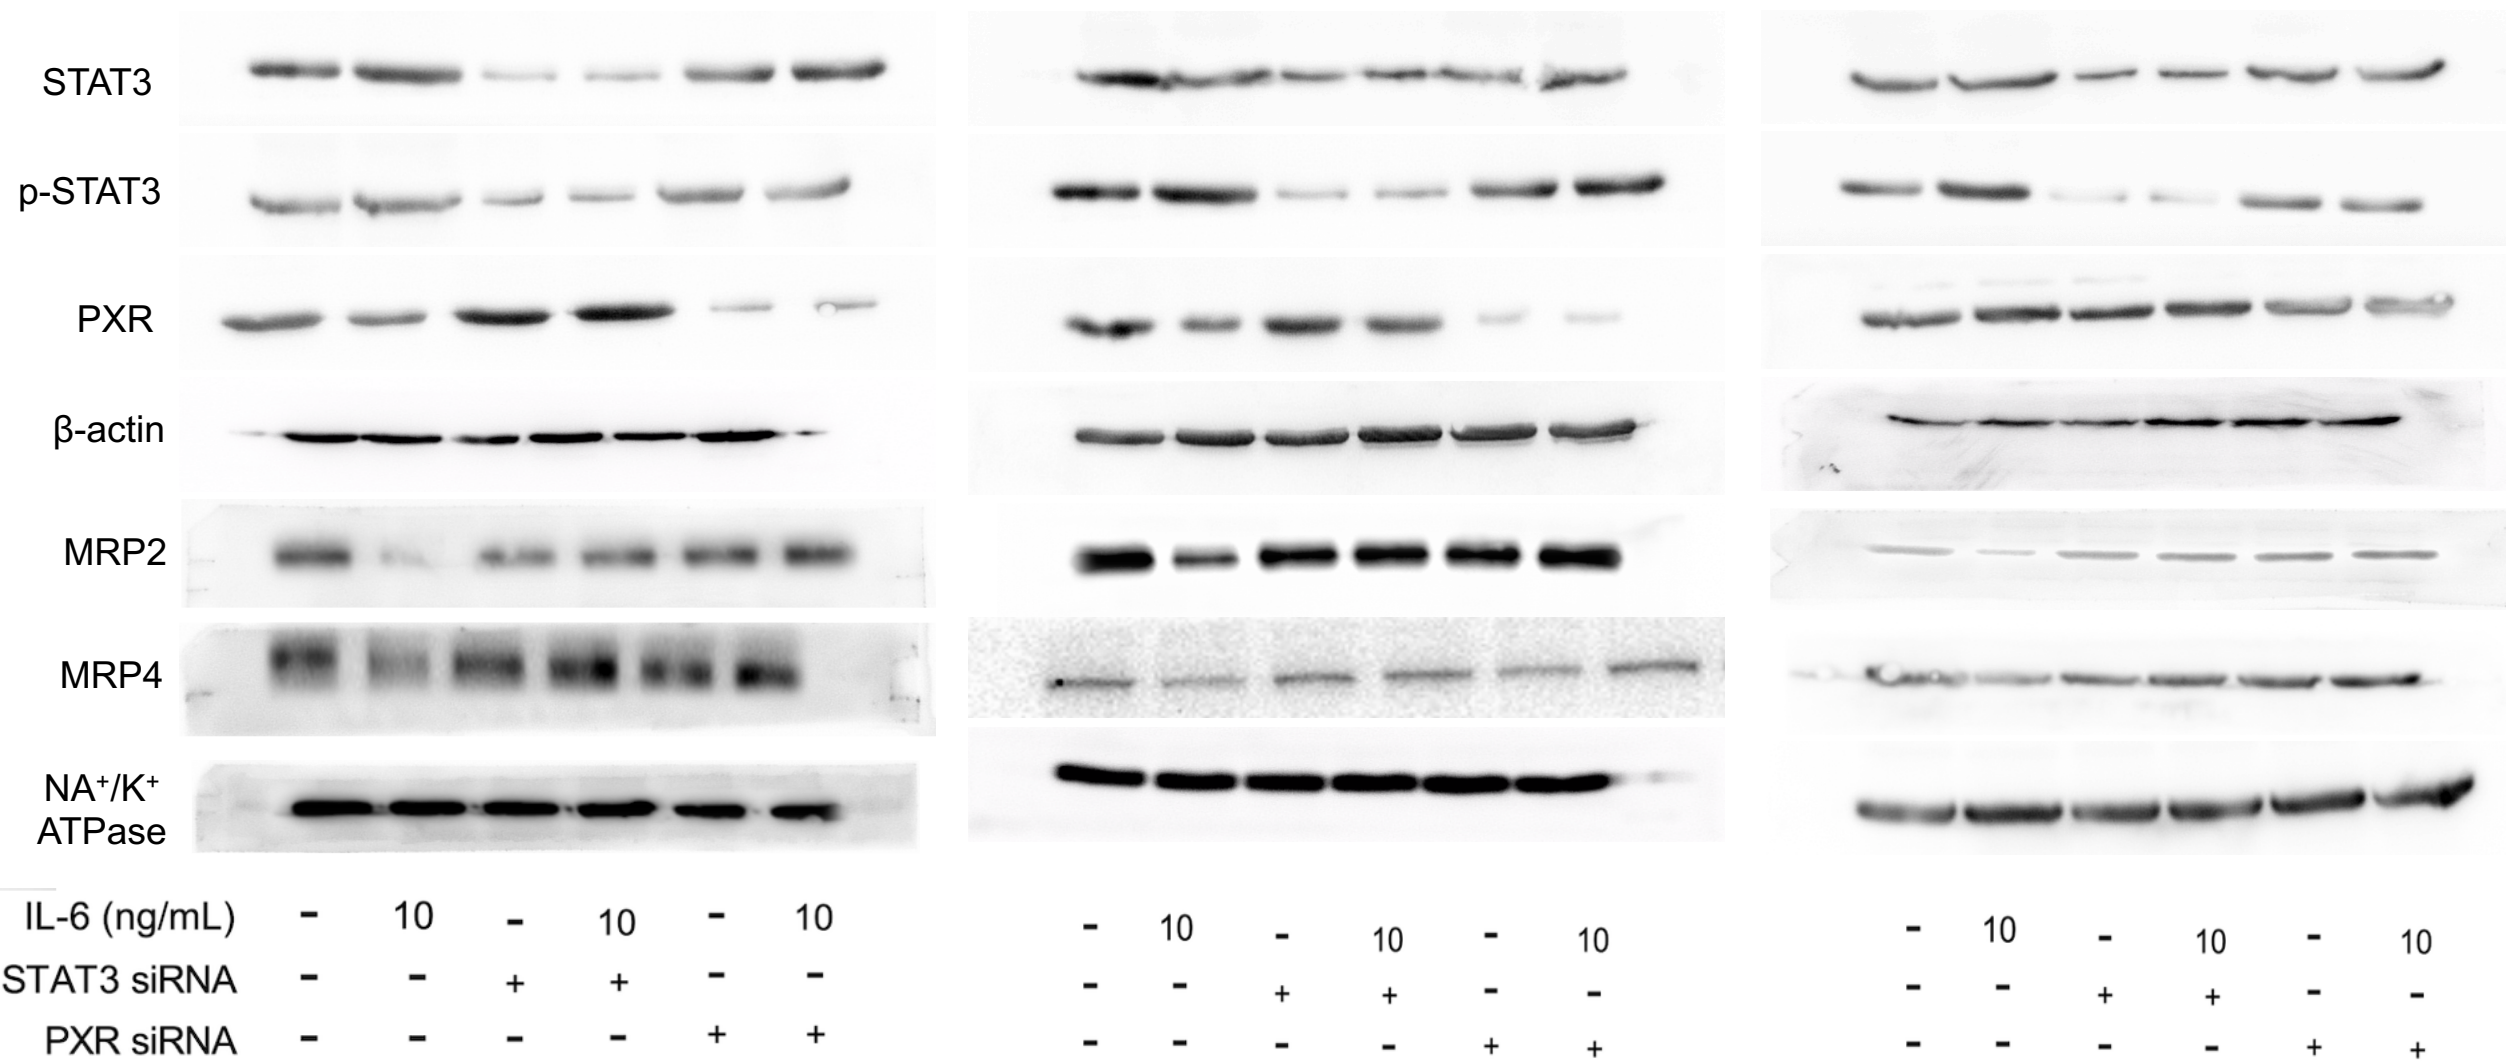

Figure 1 The full blots for the westerns of HK-2 cells treated IL-6, STAT3 siRNA and PXR siRNA. Triplicated samples were themselves run in triplicate in experiments.

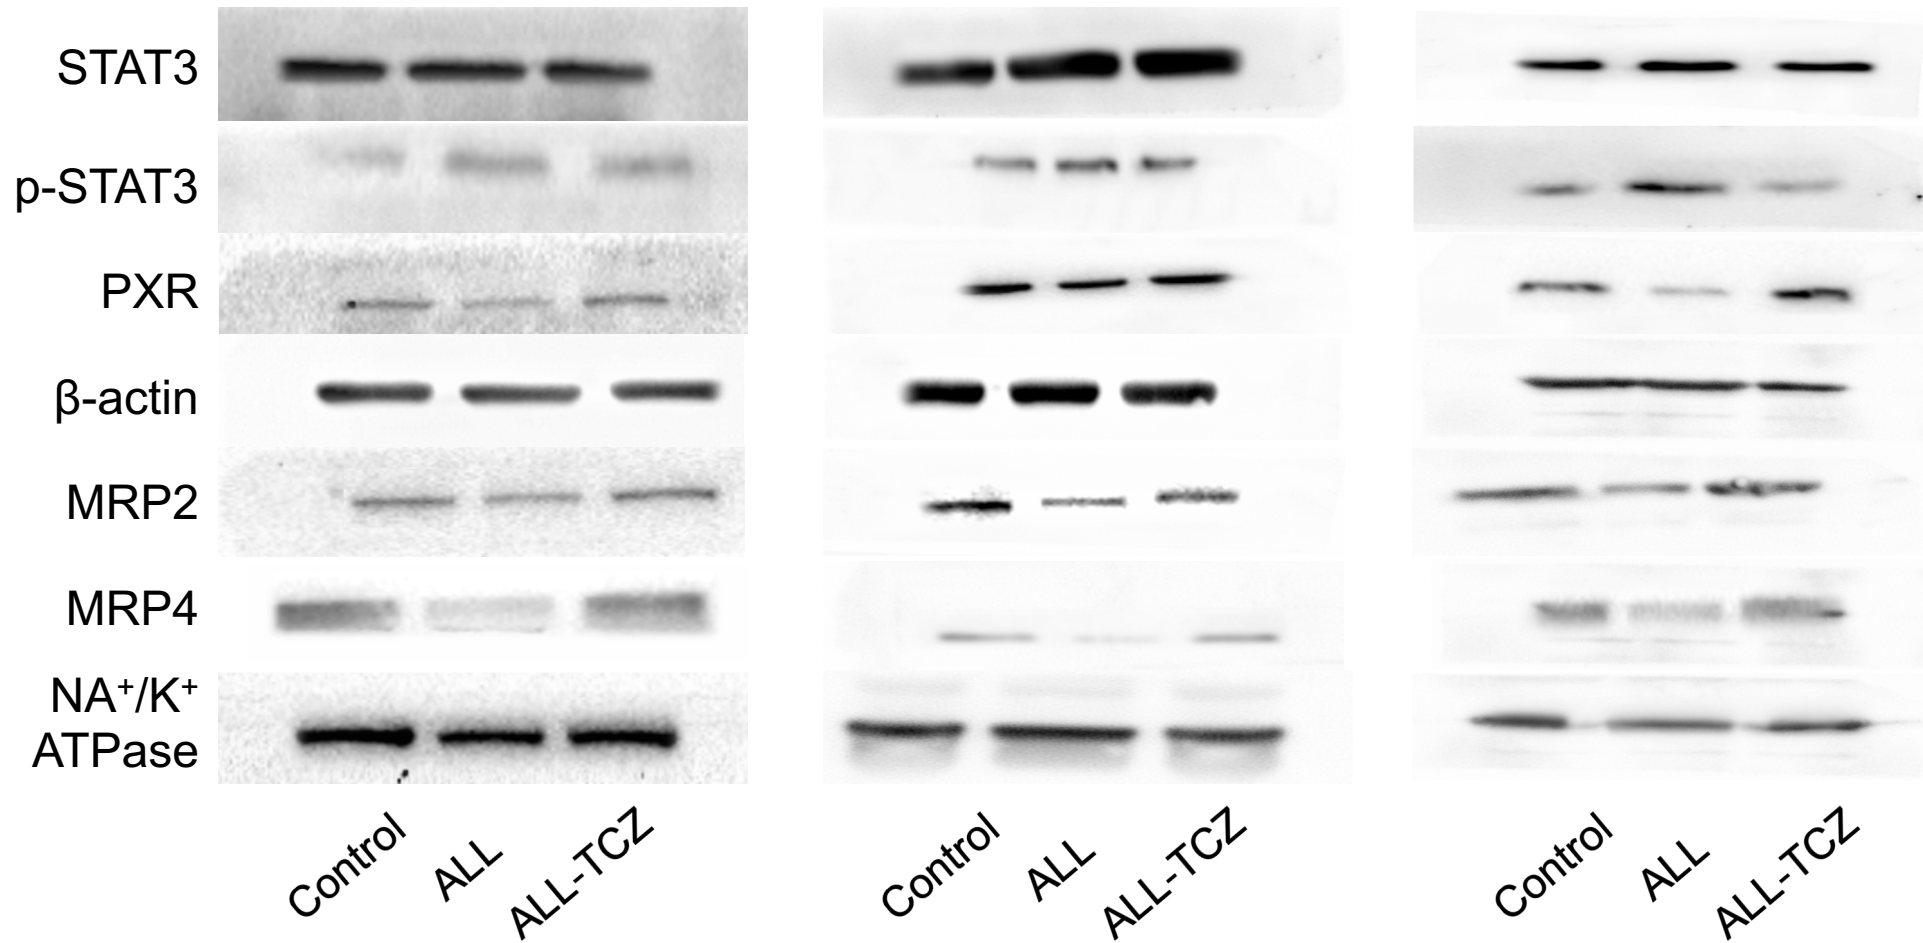

Figure 2 The full blots for the westerns of NOD SCID mice kidney treated with TCZ. Triplicated samples were themselves run in triplicate in experiments.

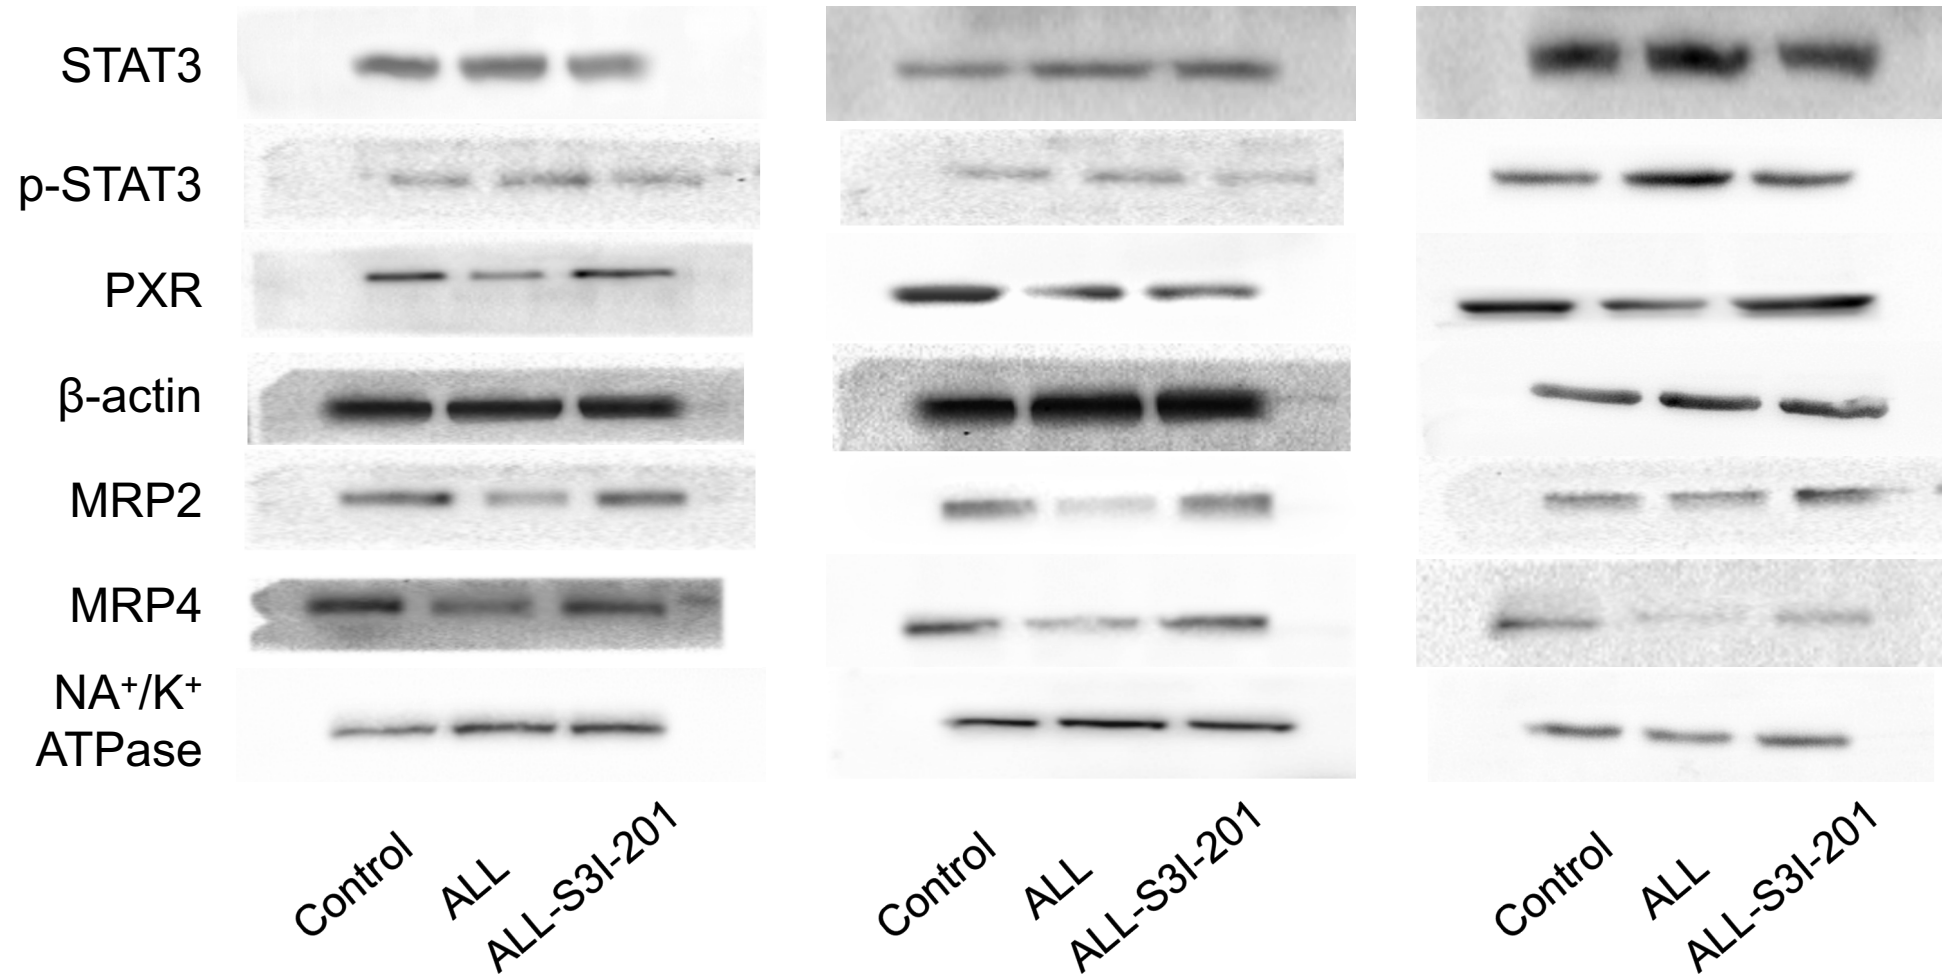

Figure 3 The full blots for the westerns of NOD SCID mice kidney treated with S3I-201. Triplicated samples were themselves run in triplicate in experiments.
